# Supplementary material for: Physicians’ perspectives on adverse drug reactions in pediatric routine care: a survey
Source: Springer Nature journal article supplement (doi:10.1007/s12519-021-00478-1), 2021-11-13
Supplement: MOESM1 [file 19863676]

## **Supplemental Material**

**Article title:** Physicians' perspectives on adverse drug reactions in pediatric routine care – a survey

**Journal:** World Journal of Pediatrics

## Online Resource 1 Questionnaire

The original questionnaire was conducted in German. For a better understanding of the survey, we translated the original questionnaire. ADRs: adverse drug reactions

| Question                                                                                                                                                                               | Answer                                                                                                                          |
|----------------------------------------------------------------------------------------------------------------------------------------------------------------------------------------|---------------------------------------------------------------------------------------------------------------------------------|
| What role do ADRs play in your routine care?                                                                                                                                           | [1] Major role<br>[2] Moderate role<br>[3] Minor role<br>[4] No role at all                                                     |
| Please estimate how many of your pediatric patients experience ADRs during drug therapy.                                                                                               | About _____%<br><input type="radio"/> I cannot assess that.                                                                     |
| Please estimate how many of your pediatric patients need to be treated as a result of an ADR on an outpatient basis (e.g. in your practice or on an outpatient basis in the hospital). | About _____%<br><input type="radio"/> I cannot assess that.                                                                     |
| Please estimate how many of your pediatric patients need inpatient hospital treatment as a result of an ADR, or how many have a prolonged inpatient stay.                              | About _____%<br><input type="radio"/> I cannot assess that.                                                                     |
| In your opinion, what are the main causes for the occurrence of ADRs in pediatric patients? (Multiple answers possible)                                                                | [1] Profile of the active ingredient<br>[2] Dosage increase<br>[3] Interactions between active ingredients<br>[3] Dosage errors |

|                                                                                                                                                                                                                                                                                                         |                                                                                                                                                                                                                                                                                                                                                                                               |
|---------------------------------------------------------------------------------------------------------------------------------------------------------------------------------------------------------------------------------------------------------------------------------------------------------|-----------------------------------------------------------------------------------------------------------------------------------------------------------------------------------------------------------------------------------------------------------------------------------------------------------------------------------------------------------------------------------------------|
|                                                                                                                                                                                                                                                                                                         | <p>[4] Non-adherence of the patient/parents</p> <p>[5] Disposition [genetic/ underlying disease]</p> <p>[6] Other_____</p> <p>[7] I cannot assess that.</p>                                                                                                                                                                                                                                   |
| <p>Which measures are the most frequent reactions in your routine care in case of an ADR in your pediatric patients? (Multiple answers possible)</p> <p>Please prioritize the 3 most important measures.</p>                                                                                            | <p>[1] Checking on correct drug use</p> <p>[2] Dose adjustment</p> <p>[3] Change of active ingredient</p> <p>[4] Discontinuation of drug therapy</p> <p>[5] Symptomatic treatment of the ADR</p> <p>[6] Monitoring of the clinical course</p> <p>[7] Referral to hospitalization</p> <p>[8] In general, no measures are necessary</p> <p>[9] Other_____</p> <p>[10] I cannot assess that.</p> |
| <p>Please position yourself on the following statements:</p> <p>„As a rule, I ask the patient/the patient's parents in the consultation to what extent they want to be informed about potential risks of drug therapy.“</p> <p>„For commonly used approved therapies: As a rule, I avoid discussing</p> | <p>For each statement:</p> <p>[1] Strongly agree</p> <p>[2] Rather agree</p> <p>[3] Rather disagree</p> <p>[4] Strongly disagree</p>                                                                                                                                                                                                                                                          |

---

potential ADRs in order not to unsettle  
the patient/the patient's parents.“

„For off-label use: As a rule, I avoid  
discussing potential ADRs in order not  
to unsettle the patient/the patient's  
parents.“

„I prescribe new drugs cautiously  
because ADRs may not yet be known.“

„I often prescribe new drugs because I  
hope for a better effectiveness.“

„From my point of view when  
patients/parents tell me about ADRs,  
indeed often an ADR occurred.“

---

|                                                                                                |                                                                                               |
|------------------------------------------------------------------------------------------------|-----------------------------------------------------------------------------------------------|
| How frequently do you report ADRs<br>approximately per year to the<br>responsible authorities? | About _____ reports per year.<br><br>○ I don't have the time to report in my<br>routine care. |
|------------------------------------------------------------------------------------------------|-----------------------------------------------------------------------------------------------|

---

|                                                                    |                   |
|--------------------------------------------------------------------|-------------------|
| Do you know the black triangle in the<br>context of ADR reporting? | [1] Yes<br>[2] No |
|--------------------------------------------------------------------|-------------------|

---

|                                                                                                      |                                                                                                   |
|------------------------------------------------------------------------------------------------------|---------------------------------------------------------------------------------------------------|
| Which ADRs do you report for drugs<br>marked with the black triangle? (Multiple<br>answers possible) | [1] Expected<br>[2] Unexpected<br>[3] Slight<br>[4] Severe<br>[5] Frequent<br>[6] Rare<br>[7] All |
|------------------------------------------------------------------------------------------------------|---------------------------------------------------------------------------------------------------|

---

---

Sociodemographic data

Sex

[1] Male

[2] Female

[3] Divers

Age

\_\_\_\_years

Professional experience

\_\_\_\_years

Specialization

[1] \_\_\_\_\_{Free answer}

[2] In training for the following  
specialization \_\_\_\_\_

Work setting

[1] Ambulatory

[2] Inpatient

[3] Ambulatory and inpatient

Localization

[1] Rural community (<5,000  
inhabitants)

[2] Small town (5,000 - <20,000  
inhabitants)

[3] Medium-sized town (20,000 -  
<100,000 inhabitants)

[4] City ( $\geq$ 100,000 inhabitants)

---
